# Supplementary material
Source: Frontiers journal article supplement (https://www.frontiersin.org/articles/258425)
Supplement: Table_1.DOCX [file Table_1.DOCX]

**Appendix 1:** The results of topic searches of the Web of Science database with what process each study provides evidence for. Search terms were: “resource tracking” OR “fruit tracking”; “neighborhood effects”; “directed dispersal”; and the combination of those terms. The abstracts of the results were read to determine what was found in each study. Studies that were referenced in the present text that did not appear in the search results were added to the table. Only fruit resource tracking is presented in the table.

|  | **Resource Tracking** | |  | **Neighborhood Effects** | | |  | **Dispersal** | | |
| --- | --- | --- | --- | --- | --- | --- | --- | --- | --- | --- |
| **Citation** | Increased Abundance | No Evidence of Tracking |  | Facilitation | Competition | No Evidence |  | Directed Dispersal | Dispersal into Poor Habitats | Dispersal into Specific Habitat |
| Manasse and Howe 1983 |  |  |  |  | X |  |  |  |  |  |
| Saracco et al. 2005 |  |  |  | X | X |  |  |  |  |  |
| Denslow 1987 |  |  |  |  | X |  |  |  |  |  |
| Smith and McWilliams 2014 |  |  |  |  | X |  |  |  |  |  |
| Carlo 2005 |  |  |  | X |  |  |  |  |  |  |
| von Zeipel and Eriksson 2007 |  |  |  | X |  |  |  |  |  |  |
| Carlo et al 2007 |  |  |  | X |  |  |  |  |  |  |
| van Ommeren and Whitham 2002 |  |  |  | X |  |  |  |  |  |  |
| Gleditsch and Carlo 2010 | X |  |  | X |  |  |  |  |  |  |
| Albrecht et al. 2015 |  |  |  | X | X |  |  |  |  |  |
| Carlo and Morales 2008 |  |  |  |  |  |  |  |  |  |  |
| Wenny 2001 |  |  |  |  |  |  |  | X |  |  |
| Loayza et al. 2014 |  |  |  |  |  |  |  | X |  |  |
| Wenny and Levey 1998 |  |  |  |  |  |  |  | X |  |  |
| Green et al 2008 |  |  |  |  |  |  |  | X |  |  |
| Salazar et al 2013 |  |  |  |  |  |  |  | X |  |  |
| Vander Wall 1990 |  |  |  |  |  |  |  | X |  |  |
| Hirsch et al. 2012 |  |  |  |  |  |  |  | X |  |  |
| Razafindratsima and Dunham 2015 | |  |  |  |  |  |  | X | X |  |
| Blendinger et al. 2008 |  |  |  |  |  | X |  |  |  |  |
| Blendinger and Villegas 2011 |  |  |  |  |  | X |  |  |  |  |
| Herrera and Jordano 1981 |  |  |  |  | X |  |  |  |  |  |
| Herrera 1984 |  |  |  | X |  |  |  |  |  |  |
| Sargent 1990 |  |  |  | X |  |  |  |  |  |  |
| French et al. 1992 |  |  |  |  |  | X |  |  |  |  |

**Appendix 1 (continued):**

|  | **Resource Tracking** | | | |  | | **Neighborhood Effects** | | | | | |  | | **Dispersal** | | | | | |
| --- | --- | --- | --- | --- | --- | --- | --- | --- | --- | --- | --- | --- | --- | --- | --- | --- | --- | --- | --- | --- |
| **Citation** | Increased Abundance | | No Evidence of Tracking | |  | | Facilitation | | Competition | | No Evidence | |  | | Directed Dispersal | | Dispersal into Poor Habitats | | Dispersal into Specific Habitat | |
| Tewksbury and Nabhan 2001 | |  | |  | |  | | X | |  | |  | |  | |  | |  | |  | |
| Burns 2002 | |  | |  | |  | | X | |  | |  | |  | |  | |  | |  | |
| Aukema and Martinez del Rio 2002 | | | |  | |  | |  | |  | |  | |  | |  | |  | |  | |
| Saracco et al. 2004 | X | |  | |  | |  | |  | |  | |  | |  | |  | |  | |
| Carlo and Aukema 2005 |  | |  | |  | | X | |  | |  | |  | |  | |  | |  | |
| Camargo et al. 2016 |  | |  | |  | |  | |  | |  | |  | | X | |  | |  | |
| Guerra and Pizo 2014 |  | |  | |  | |  | |  | |  | |  | | X | |  | |  | |
| Adie and Yeaton 2014 |  | |  | |  | |  | |  | |  | |  | | X | |  | |  | |
| Montano-Centellas 2013 |  | |  | |  | |  | |  | |  | |  | | X | |  | |  | |
| Okubamichael et al. 2011 |  | |  | |  | |  | |  | |  | |  | | X | |  | |  | |
| Christianni et al. 2010 |  | |  | |  | |  | |  | |  | |  | | X | |  | |  | |
| Garcia et al. 2009 | X | |  | |  | |  | |  | |  | |  | | X | |  | |  | |
| Venabel and Brown 1993 |  | |  | |  | |  | |  | |  | |  | | X | |  | |  | |
| Spiegel and Nathan 2012 |  | |  | |  | |  | |  | |  | |  | |  | | X | |  | |
| Nakashima et al. 2010 |  | |  | |  | |  | |  | |  | |  | | X | | X | |  | |
| Morales et al. 2012 |  | |  | |  | | X | |  | |  | |  | |  | |  | |  | |
| Prasad and Sukumar 2010 |  | |  | |  | |  | | X | |  | |  | |  | |  | |  | |
| Stoll and Newbery 2005 |  | |  | |  | |  | |  | |  | |  | |  | |  | |  | |
| Blendinger et al. 2015b | X | |  | |  | |  | |  | |  | |  | |  | |  | |  | |
| Naniwadekar et al. 2015 | X | |  | |  | |  | |  | |  | |  | |  | |  | |  | |
| Martinez and Garcia 2015 | X | |  | |  | |  | |  | |  | |  | |  | |  | |  | |
| Rodriguez-Perez et al. 2014 | X | |  | |  | |  | |  | |  | |  | |  | |  | | X | |
| Telleria et al. 2014a | X | |  | |  | |  | |  | |  | |  | |  | |  | | X | |
| Maruyama et al 2013 | X | |  | |  | |  | |  | |  | |  | |  | |  | |  | |
| Garcia et al. 2013 | X | |  | |  | |  | |  | |  | |  | |  | |  | |  | |
| Blendinger et al. 2012 | X | |  | |  | |  | |  | |  | |  | |  | |  | |  | |
| de Castro et al. 2012 | X | |  | |  | |  | |  | |  | |  | |  | |  | |  | |
| Rodriguez-Cabal and Branch 2011 | X | |  | |  | |  | |  | |  | |  | |  | |  | |  | |
| Garcia et al. 2011 | X | |  | |  | |  | |  | |  | |  | |  | |  | |  | |

**Appendix 1 (continued):**

|  | **Resource Tracking** | | | |  | | **Neighborhood Effects** | | | | | |  | **Dispersal** | | | | | | |
| --- | --- | --- | --- | --- | --- | --- | --- | --- | --- | --- | --- | --- | --- | --- | --- | --- | --- | --- | --- | --- |
| **Citation** | Increased Abundance | | No Evidence of Tracking | |  | | Facilitation | | Competition | | No Evidence | |  | Directed Dispersal | | | Dispersal into Poor Habitats | | Dispersal into Specific Habitat | |
| Hampe 2008 | | X | |  | |  | | X | |  | |  | | |  |  | |  | | X | |
| Guitian and Munilla 2008 | | X | |  | |  | |  | |  | |  | | |  |  | |  | |  | |
| Garcia and Ortiz-Pulido 2004 | X | |  | |  | |  | |  | |  | |  |  | | |  | |  | |
| Holbrook et al. 2002 | X | |  | |  | |  | |  | |  | |  |  | | |  | |  | |
| Whitney and Smith 1998 | X | |  | |  | |  | |  | |  | |  |  | | |  | |  | |
| Telleria et al. 2008 | X | |  | |  | |  | |  | |  | |  |  | | |  | |  | |
| Telleria and Perez-Tris 2007 | X | |  | |  | |  | |  | |  | |  |  | | |  | |  | |
| Guitan and Bermejo 2006 |  | | X | |  | |  | |  | |  | |  |  | | |  | |  | |
| Telleria et al. 2005 | X | |  | |  | |  | |  | |  | |  |  | | |  | |  | |
| Githiru et al. 2005 |  | | X | |  | |  | |  | |  | |  |  | | |  | |  | |
| Moegenburg and Levey 2003 | X | |  | |  | |  | |  | |  | |  |  | | |  | |  | |
| Telleria and Perez-Tris 2003 | X | |  | |  | |  | |  | |  | |  |  | | |  | |  | |
| Rey 1995 | X | |  | |  | |  | |  | |  | |  |  | | |  | |  | |
| Blendiger et al. 2015a | X | |  | |  | |  | |  | |  | |  |  | | |  | |  | |
| Wunderle et al. 2014 | X | |  | |  | |  | |  | |  | |  |  | | |  | |  | |
| Telleria et al. 2014b | X | |  | |  | |  | |  | |  | |  |  | | |  | |  | |
| Hasui et al. 2012 | X | |  | |  | |  | |  | |  | |  |  | | |  | |  | |
| Telleria et al. 2011 | X | |  | |  | |  | |  | |  | |  |  | | |  | |  | |
| Vergara et al. 2010 | X | |  | |  | |  | |  | |  | |  |  | | |  | |  | |
| Lehouck et al. 2009 |  | | X | |  | |  | |  | |  | |  |  | | |  | |  | |
| Pavey and Nano 2009 |  | | X | |  | |  | |  | |  | |  |  | | |  | |  | |
| Borghesio and Laiolo 2004 | X | |  | |  | |  | |  | |  | |  |  | | |  | |  | |
| Carlo et al. 2013 |  | |  | |  | |  | |  | |  | |  |  | | |  | | X | |
| Carlo and Tewksbury 2014 |  | |  | |  | |  | |  | |  | |  | X | | |  | |  | |
| Levey 1988 | X | |  | |  | |  | |  | |  | |  |  | | |  | |  | |
| Martin and Karr 1986 | X | |  | |  | |  | |  | |  | |  |  | | |  | |  | |
| Fleming 1992 | X | |  | |  | |  | |  | |  | |  |  | | |  | |  | |
| TOTAL | 35 | | 4 | |  | | 14 | | 7 | | 3 | |  | 18 | | | 3 | | 4 | |

References:

Adie, H. and Yeaton, R.I., (2014). Directed dispersal and decomposition drive cyclic succession in arid subtropical thicket. *Plant ecology*, 215(5), 507-515.

Albrecht, J., Bohle, V., Berens, D.G., Jaroszewicz, B., Selva, N., and Farwig, N. (2015). Variation in neighbourhood context shapes frugivore-mediated facilitation and competition among co-dispersed plant species. *Journal of Ecology* 103, 526-536.

Aukema, J.E. and Martínez del Rio, C., (2002). Where does a fruit‐eating bird deposit mistletoe seeds? Seed deposition patterns and an experiment. Ecology, 83(12), 3489-3496.

Blendinger, P.G. and Villegas, M., (2011). Crop size is more important than neighborhood fruit availability for fruit removal of Eugenia uniflora (Myrtaceae) by bird seed dispersers. *Plant Ecology*, 212(5), 889-899.

Blendinger, P.G., Giannini, N.P., Zampini, I.C., Ordoñez, R., Torres, S., Sayago, J.E., Ruggera, R.A., and Isla, M. I. (2015a). Nutrients in fruits as determinants of resource tracking by birds. *Ibis* 157(3), 480-495.

Blendinger, P.G., Jiménez, J., Macchi, L., Martín, E., Sánchez, M.S. and Ayup, M.M., (2015b). Scale‐Dependent Spatial Match between Fruits and Fruit‐eating Birds during the Breeding Season in Yungas Andean Forests. *Biotropica*, 47(6), 702-711.

Blendinger, P.G., Loiselle, B.A. and Blake, J.G., (2008). Crop size, plant aggregation, and microhabitat type affect fruit removal by birds from individual melastome plants in the Upper Amazon. *Oecologia*, 158(2), 273-283.

Blendinger, P.G., Ruggera, R.A., Núñez Montellano, M.G., Macchi, L., Zelaya, P.V., Álvarez, M.E., Martín, E., Acosta, O.O., Sánchez, R., and Haedo, J. (2012). Fine-tuning the fruit-tracking hypothesis: spatiotemporal links between fruit availability and fruit consumption by birds in Andean mountain forests. *Journal of Animal Ecology* 81, 1298-1310.

Borghesio, L., and Laiolo, P. (2004). Seasonal foraging ecology in a forest avifauna of northern Kenya. *Journal of Tropical Ecology* 20, 145-155.

Burns, K.C., (2002). Seed dispersal facilitation and geographic consistency in bird–fruit abundance patterns. *Global Ecology and Biogeography*, 11(3), 253-259.

Camargo, P.H., Martins, M.M., Feitosa, R.M. and Christianini, A.V., (2016). Bird and ant synergy increases the seed dispersal effectiveness of an ornithochoric shrub. *Oecologia*, 181(2), 507-518.

Carlo T.A. and Aukema J.E. (2005). Female directed dispersal and facilitation between a tropical mistletoe and its dioecious host. *Ecology* 86, 3245-3251.

Carlo, T.A. (2005). Interspecific neighbors change seed dispersal pattern of an avian-dispersed plant. *Ecology* 86, 2440-2449.

Carlo, T.A. and Tewksbury, J.J. (2014). Directness and tempo of avian seed dispersal increases emergence of wild chiltepins in desert grasslands. *Journal of Ecology* 102, 248-255. doi: 10.1111/1365-2745.12180

Carlo, T.A., and Morales, J.M. (2008). Inequalities in fruit-removal and seed dispersal: consequences of bird behaviour, neighbourhood density and landscape aggregation. *Journal of Ecology* 96, 609-618.

Carlo, T.A., Aukema, J.E., and Morales, J.M. (2007). “Plant-frugivore interactions as spatially explicit networks: integrating frugivore foraging with fruiting plant spatial patterns” in *Seed dispersal: theory and its application in a changing world*, eds. A.J. Dennis, E.W. Schupp, R.J. Green & D.A. Westcott. CABI Publishing), 369-390.

Carlo, T.A., García, D., Martínez, D., Gleditsch, J.M., and Morales, J.M. (2013). Where do seeds go when they go far? Integrating distance and directionality of avian seed dispersal in heterogeneous landscapes. *Ecology* 94, 301-307.

Christianini, A.V. and Oliveira, P.S., (2010). Birds and ants provide complementary seed dispersal in a neotropical savanna. *Journal of Ecology*, 98(3), pp.573-582.

de Castro, E.R., Côrtes, M.C., Navarro, L., Galetti, M. and Morellato, L.P.C., (2012). Temporal variation in the abundance of two species of thrushes in relation to fruiting phenology in the Atlantic rainforest. *Emu*, 112(2), 137-148.

Denslow, J.S. (1987). Fruit removal rates from aggregated and isolated bushes of the red elderberry, Sambucus pubens. *Canadian Journal of Botany* 65, 1229-1235.

Fleming, T.H. (1992). "How do fruit- and nectar-feeding birds and mammals track their food resources?," in *Effects of Resource Distribution on Animal-Plant Interactions*, eds. M.D. Hunter, T. Ohgushi & P.W. Price. Elsevier BV, 355-391.

French, K., O'Dowd, D.J. and Lill, A., (1992). Fruit removal of Coprosma quadrifida (Rubiaceae) by birds in south‐eastern Australia. *Austral Ecology*, 17(1), 35-42.

García, D., and Ortiz-Pulido, R. (2004). Patterns of resource tracking by avian frugivores at multiple spatial scales: two case studies on discordance among scales. *Ecography* 27, 187-196.

García, D., Martínez, D., Herrera, J.M. and Morales, J.M., (2013). Functional heterogeneity in a plant–frugivore assemblage enhances seed dispersal resilience to habitat loss. *Ecography*, 36(2), 197-208.

García, D., Rodríguez‐Cabal, M.A. and Amico, G.C., (2009). Seed dispersal by a frugivorous marsupial shapes the spatial scale of a mistletoe population. *Journal of Ecology*, 97(2), 217-229.

Garcia, D., Zamora, R., and Amico, G.C. (2011). The spatial scale of plant-animal interactions: effects of resource availability and habitat structure. *Ecological Monographs* 81, 103-121.

Githiru, M., Bennun, L.A., Lens, L. and Ogol, C.P.K.O., (2005). Spatial and temporal variation in fruit and fruit-eating birds in the Taita Hills, south-east Kenya. *Ostrich-Journal of African Ornithology*, 76(1-2), 37-44.

Gleditsch, J.M., and Carlo, T.A. (2010). Fruit quantity of invasive shrubs predicts the abundance of common native avian frugivores in central Pennsylvania. *Diversity and Distributions* 17, 244-253.

Green, A.K., Ward, D., and Griffiths, M.E. (2009). Directed dispersal of mistletoe (Plicosepalus acaciae) by Yellow-vented Bulbuls (Pycnonotus xanthopygos). *Journal of Ornithology* 150, 167-173.

Guerra, T.J. and Pizo, M.A., (2014). Asymmetrical dependence between a Neotropical mistletoe and its avian seed disperser. *Biotropica*, 46(3), 285-293.

Guitián, J. and Bermejo, T., (2006). Dynamics of plant–frugivore interactions: a long-term perspective on holly–redwing relationships in northern Spain. *Acta Oecologica*, 30(2), 151-160.

Guitián, J. and Munilla, I., (2008). Resource tracking by avian frugivores in mountain habitats of northern Spain. *Oikos*, 117(2), 265-272.

Hampe, A. (2008). Fruit tracking, frugivore satiation, and their consequences for seed dispersal. *Oecologia*, 156(1), 137-145.

Hasui, E., Ramos, F.N., Tamashiro, J.Y. and Silva, W.R., (2012). Non-sequential fruit tracking by birds along an altitudinal gradient. *Acta oecologica*, 45, 66-78.

Herrera, C.M. and Jordano, P., (1981). Prunus mahaleb and Birds: The High‐Efficiency Seed Dispersal System of a Temperate Fruiting Tree. *Ecological monographs*, 51(2), 203-218.

Herrera, C.M., (1984). Seed dispersal and fitness determinants in wild rose: combined effects of hawthorn, birds, mice, and browsing ungulates. *Oecologia*, 63(3), 386-393.

Hirsch, B.T., Kays, R., Pereira, V.E., and Jansen, P.A. (2012). Directed seed dispersal towards areas with low conspecific tree density by a scatter-hoarding rodent. *Ecology Letters* 15, 1423-1429.

Holbrook, K.M., Smith, T.B. and Hardesty, B.D., (2002). Implications of long‐distance movements of frugivorous rain forest hornbills. *Ecography*, 25(6), 745-749.

Lehouck, V., Spanhove, T., Vangestel, C., Cordeiro, N.J. and Lens, L., (2009). Does landscape structure affect resource tracking by avian frugivores in a fragmented Afrotropical forest?. *Ecography*, 32(5), 789-799.

Levey, D.J. (1988). Spatial and temporal variation in Costa Rican fruit and fruit-eating bird abundance. *Ecological Monographs* 58, 251-269.

Loayza, A.P., Carvajal, D.E., García-Guzmán, P., Gutierrez, J.R., and Squeo, F.A. (2014). Seed predation by rodents results in directed dispersal of viable seed fragments of an endangered desert shrub. *Ecosphere* 5, art43.

Manasse, R.S., and Howe, H.F. (1983). Competition for dispersal agents among tropical trees: influences of neighbors. *Oecologia* 59, 185-190.

Martin, T.E., and Karr, J.R. (1986). Temporal dynamics of Neotropical birds with special reference to frugivores in second-growth woods. *The Wilson Bulletin* 98, 38-60.

Martínez, D. and García, D., (2015). Disentangling habitat use by frugivorous birds: constant interactive effects of forest cover and fruit availability. *Basic and Applied Ecology*, 16(5), 460-468.

Maruyama, P.K., Borges, M.R., Silva, P.A., Burns, K.C. and Melo, C., (2013). Avian frugivory in Miconia (Melastomataceae): contrasting fruiting times promote habitat complementarity between savanna and palm swamp. *Journal of Tropical Ecology*, 29(02), 99-109.

Moegenburg, S.M., and Levey, D.J. (2003). Do frugivores respond to fruit harvest? an experimental study of short-term responses. *Ecology* 84, 2600-2612.

Montaño‐Centellas, F.A., (2013). Effectiveness of mistletoe seed dispersal by tyrant flycatchers in a mixed Andean landscape. *Biotropica*, 45(2), 209-216.

Morales, J.M., Rivarola, M.D., Amico, G., and Carlo, T.A. (2012). Neighborhood effects on seed dispersal by frugivores: testing theory with a mistletoe–marsupial system in Patagonia. *Ecology* 93, 741-748.

Nakashima, Y., Inoue, E., Inoue-Murayama, M. and Sukor, J.R.A., (2010). Functional uniqueness of a small carnivore as seed dispersal agents: a case study of the common palm civets in the Tabin Wildlife Reserve, Sabah, Malaysia. *Oecologia*, 164(3), 721-730.

Naniwadekar, R., Mishra, C. and Datta, A., (2015). Fruit resource tracking by hornbill species at multiple scales in a tropical forest in India. *Journal of Tropical Ecology*, 31(06), 477-490.

Okubamichael, D.Y., Rasheed, M.Z., Griffiths, M.E. and Ward, D., (2011). Avian consumption and seed germination of the hemiparasitic mistletoe Agelanthus natalitius (Loranthaceae). *Journal of Ornithology*, 152(3), 643-649.

Pavey, C.R. and Nano, C.E.M., (2009). Bird assemblages of arid Australia: vegetation patterns have a greater effect than disturbance and resource pulses. *Journal of Arid Environments*, 73(6), 634-642.

Prasad, S. and Sukumar, R., (2010). Context‐dependency of a complex fruit–frugivore mutualism: temporal variation in crop size and neighborhood effects. *Oikos*, 119(3), 514-523.

Razafindratsima, O.H., and Dunham, A.E. (2015). Assessing the impacts of nonrandom seed dispersal by multiple frugivore partners on plant recruitment. *Ecology* 96, 24-30.

Rey, P.J. (1995). Spatio-temporal variation in fruit and frugivorous bird abundance in olive orchards. *Ecology* 76, 1625-1635.

Rodriguez-Cabal, M.A. and Branch, L.C., (2011). Influence of habitat factors on the distribution and abundance of a marsupial seed disperser. *Journal of Mammalogy*, 92(6), 1245-1252.

Rodríguez-Pérez, J., García, D. and Martínez, D. (2014). Spatial networks of fleshy-fruited trees drive the flow of avian seed dispersal through a landscape. *Funct Ecol*, 28: 990–998. doi:10.1111/1365-2435.12276.

Salazar, D., Kelm, D.H., and Marquis, R.J. (2013). Directed seed dispersal of Piper by Carollia perspicillata and its effect on understory plant diversity and folivory. *Ecology* 94, 2444-2453.

Saracco, J.F., Collazo, J.A., and Groom, M.J. (2004). How do frugivores track resources? Insights from spatial analyses of bird foraging in a tropical forest. *Oecologia* 139, 235-245.

Saracco, J.F., Collazo, J.A., Groom, M.J., and Carlo, T. (2005). Crop size and fruit neighborhood effects on bird visitation to fruiting Schefflera morototoni trees in Puerto Rico. *Biotropica* 37, 81-87.

Sargent, S. (1990). Neighborhood effects on fruit removal by birds: a field experiment with Viburnum dentatum (Caprifoliaceae). *Ecology* 71, 1289-1298.

Smith, A.D., and Mcwilliams, S.R. (2014). Fruit removal rate depends on neighborhood fruit density, frugivore abundance, and spatial context. *Oecologia* 174, 931-942.

Spiegel, O. and Nathan, R., (2012). Empirical evaluation of directed dispersal and density‐dependent effects across successive recruitment phases. *Journal of Ecology*, 100(2), 392-404.

Stoll, P. and Newbery, D.M., (2005). Evidence of species‐specific neighborhood effects in the dipterocarpaceae of a Bornean rain forest. *Ecology*, 86(11), 3048-3062.

Tellería, J.L. and Pérez‐Tris, J., (2003). Seasonal distribution of a migratory bird: effects of local and regional resource tracking. *Journal of Biogeography*, 30(10), 1583-1591.

Telleria, J.L. and Pérez‐Tris, J., (2007). Habitat effects on resource tracking ability: do wintering Blackcaps Sylvia atricapilla track fruit availability?. *Ibis*, 149(1), 18-25.

Tellería, J.L., Carrascal, L.M. and Santos, T., (2014a). Large-scale features affect spatial variation in seed dispersal by birds in juniper woodlands. *Ecological research*, 29(1), 13-20.

Tellería, J.L., Carrascal, L.M. and Santos, T., (2014b). Species abundance and migratory status affects large-scale fruit tracking in thrushes (Turdus spp.). *Journal of Ornithology*, 155(1), 157-164.

Tellería, J.L., De La Hera, I., Ramírez, Á. and Santos, T., (2011). Conservation opportunities in Spanish Juniper Juniperus thurifera woodlands: the case of migratory thrushes Turdus spp. *Ardeola*, 58(1), 57-70.

Tellería, J.L., Ramírez, Á. and Pérez-Tris, J., (2005). Conservation of seed-dispersing migrant birds in Mediterranean habitats: shedding light on patterns to preserve processes. *Biological Conservation*, 124(4), 493-502.

Tellería, J.L., Ramirez, A. and Pérez‐Tris, J., (2008). Fruit tracking between sites and years by birds in Mediterranean wintering grounds. *Ecography*, 31(3), 381-388.

Tewksbury, J.J. and Nabhan, G.P., (2001). Seed dispersal: directed deterrence by capsaicin in chillies. *Nature*, 412(6845), 403.

van Ommeren, R.J., and Whitham, T.G. (2002). Changes in interactions between juniper and mistletoe mediated by shared avian frugivores: parasitism to potential mutualism. *Oecologia* 130, 281-288.

Vander Wall, S.B. (1990). Food Hoarding in Animals. Chicago, IL: University of Chicago Press.

Venable, D.L. and Brown, J.S., (1993). The population-dynamic functions of seed dispersal. Plant *Ecology*, 107(1), 31-55.

Vergara, P.M., Smith, C., Delpiano, C.A., Orellana, I., Gho, D. and Vazquez, I., (2010). Frugivory on Persea lingue in temperate Chilean forests: interactions between fruit availability and habitat fragmentation across multiple spatial scales. *Oecologia*, 164(4), 981-991.

Von Zeipel, H., and Eriksson, O. (2007). Fruit removal in the forest herb Actaea spicata depends on local context of fruits sharing the same dispersers. *International Journal of Plant Sciences* 168, 855-860.

Wenny, D.G. (2001). Advantages of seed dispersal: A re-evaluation of directed dispersal. *Evolutionary Ecology Research* 3, 51-74.

Wenny, D.G., and Levey, D.J. (1998). Directed seed dispersal by bellbirds in a tropical cloud forest. *Proceedings of the National Academy of Sciences USA* 95, 6204-6207.

Whitney, K.D. and Smith, T.B., (1998). Habitat use and resource tracking by African Ceratogymna hornbills: implications for seed dispersal and forest conservation. *Animal Conservation*, 1(2), 107-117.

Wunderle Jr, J.M., Lebow, P.K., White, J.D., Currie, D. and Ewert, D.N., (2014). Sex and age differences in site fidelity, food resource tracking, and body condition of wintering Kirtland’s warblers (Setophaga kirtlandii) in the Bahamas. *Ornithological Monographs*, 80(2014), 1-62.
